# Supplementary material
Source: publisher site journal article supplement (https://www.dovepress.com/article/218988)
Supplement: Supplementary file 1 [file get_supplementary_file.php]

**Supplementary Material**

**A nanodrug consisting of doxorubicin and exosome derived from mesenchymal stem cells for osteosarcoma treatment in vitro**

Hongxiang Wei1*, Jinyuan Chen2*,Shenglin Wang1*, Feihuan Fu3, Xia Zhu1, Chaoyang Wu1, Zhoujie Liu4, Guangxian Zhong1, Jianhua Lin1

**Figure S1** Intracellular distribution of Dox (A)and Exo-DOX (B) after 1 hours, 4 hours and 24 hours incubation with H9C2 cells, bar was 50μm. The histogram (C) and Quantification (D) of internalized Dox, Exo-Dox using flow cytometry after incubation with H9C2 cells for 1 h,4 h and 24 h. All of the data are presented as mean±s.d. (n=3) and analyzed with two-way ANOVA (****P < 0.0001).

**(A)**

**
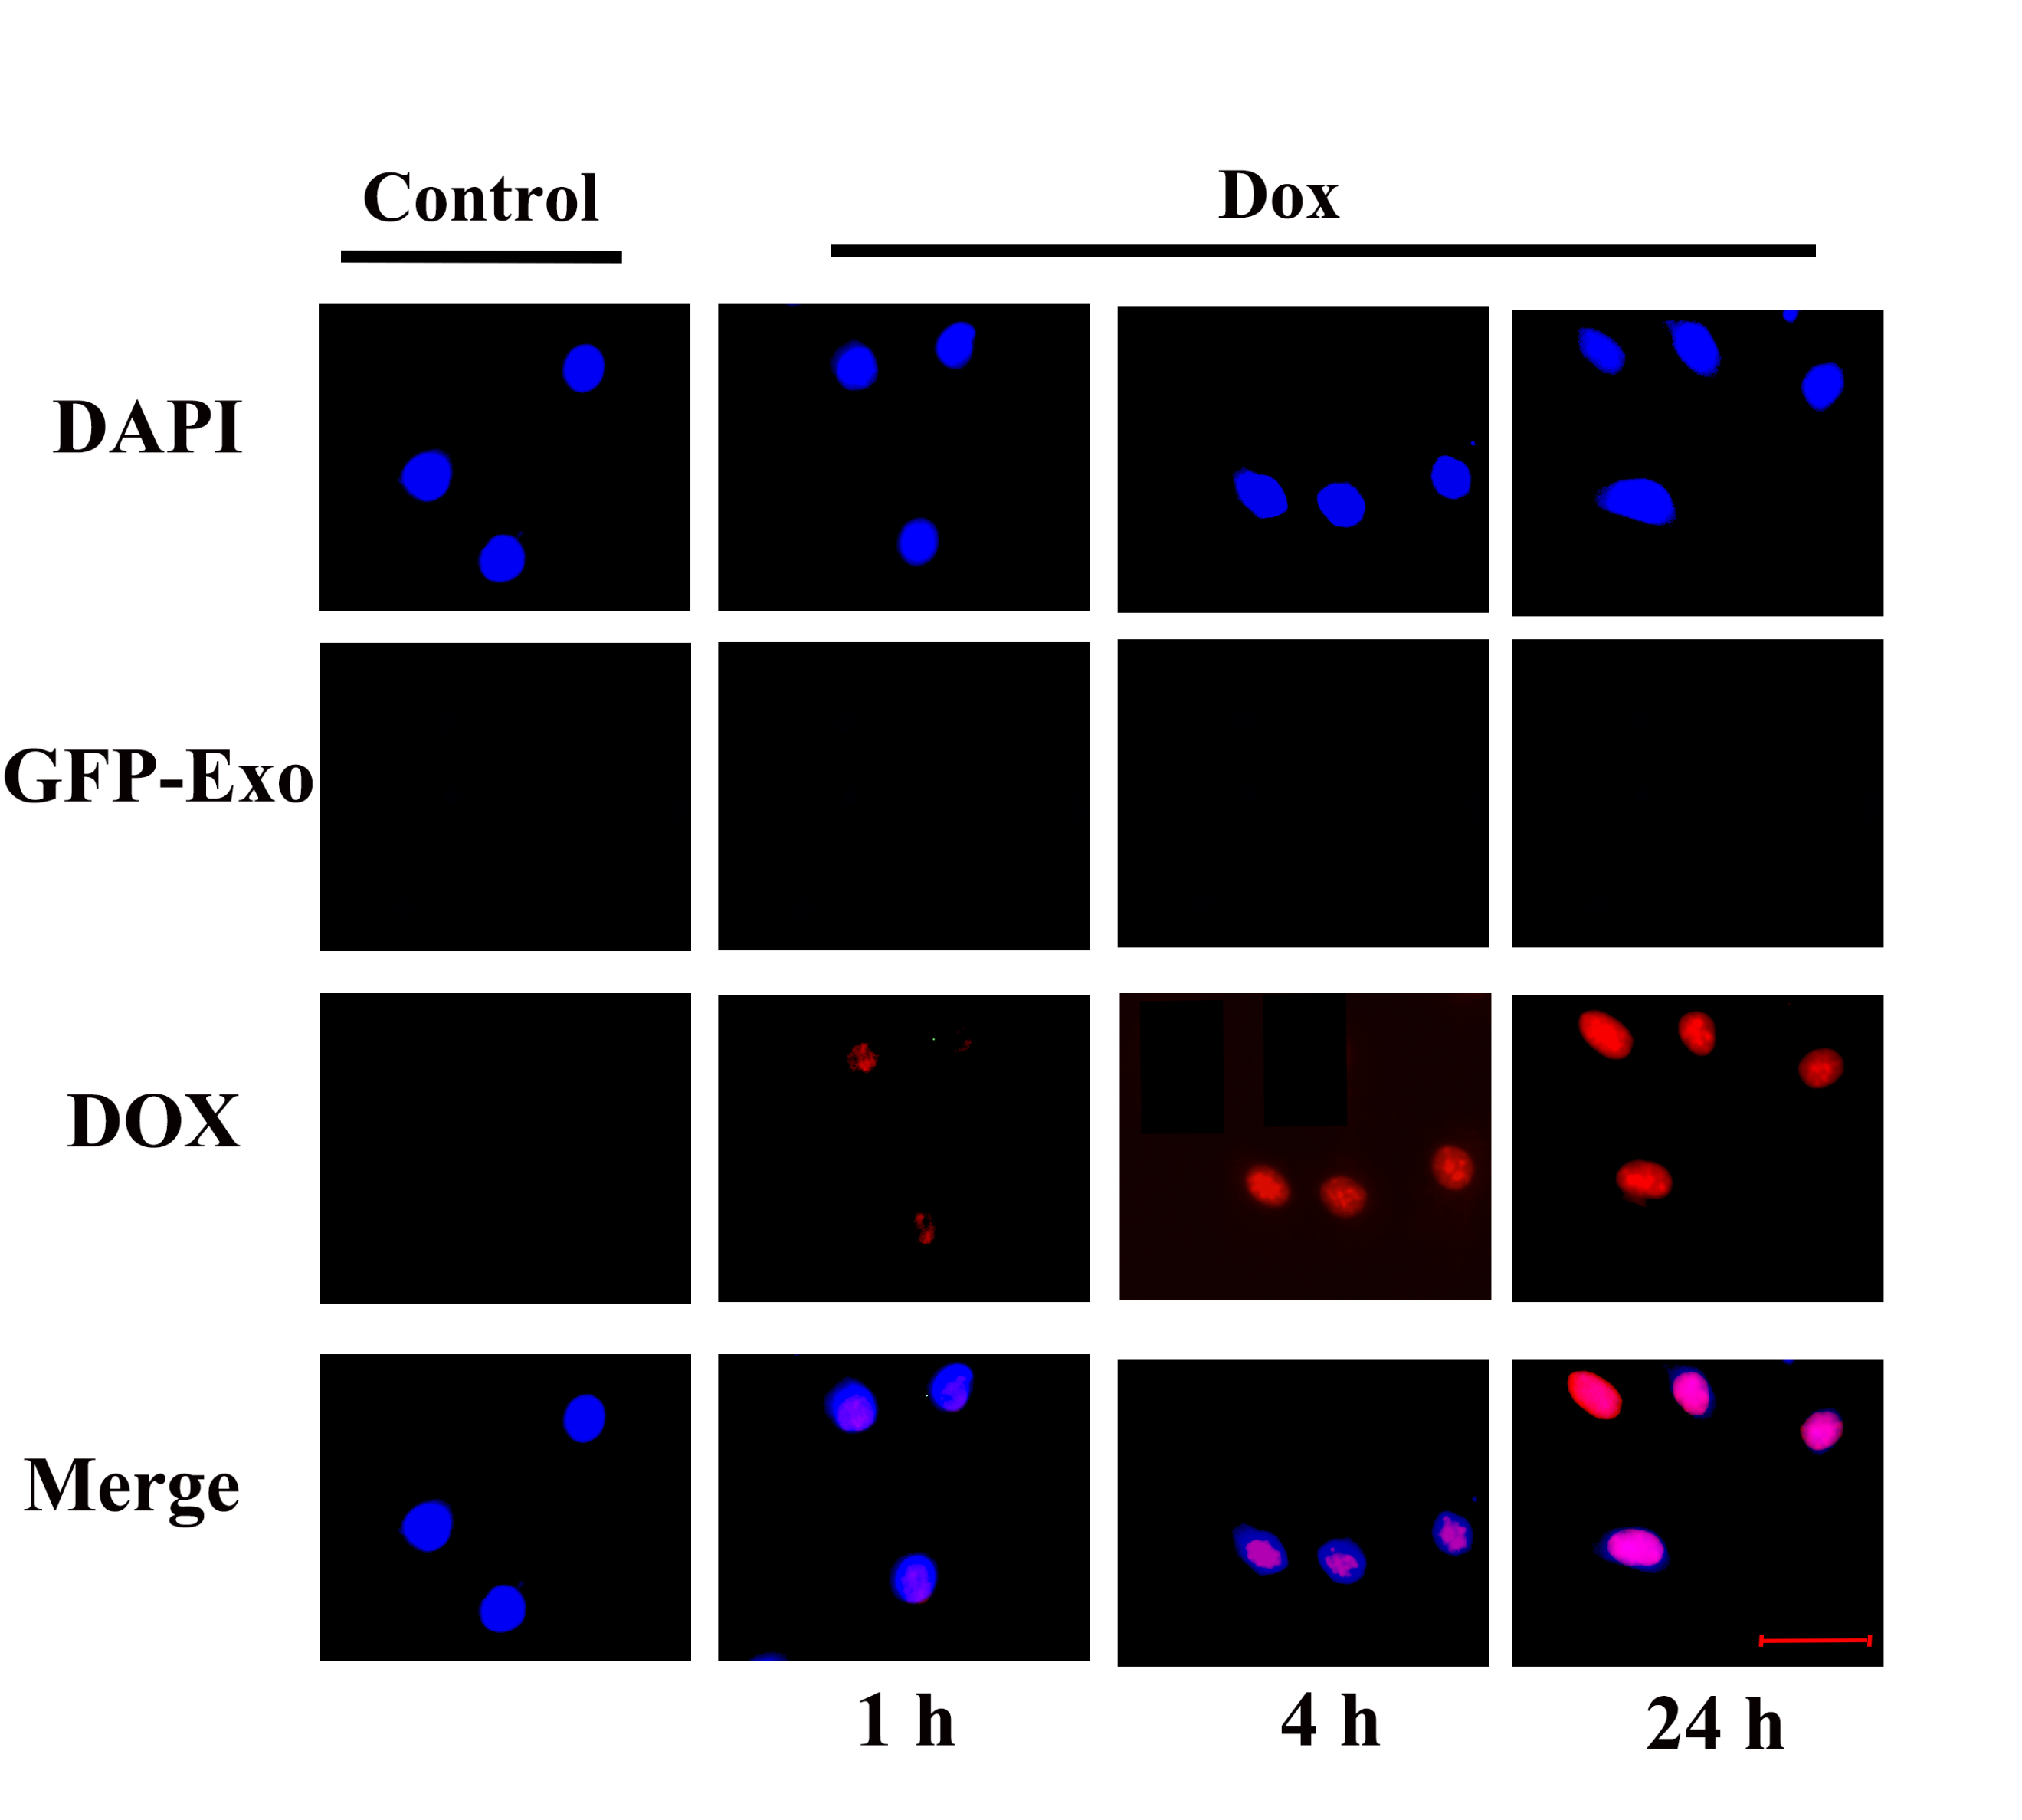

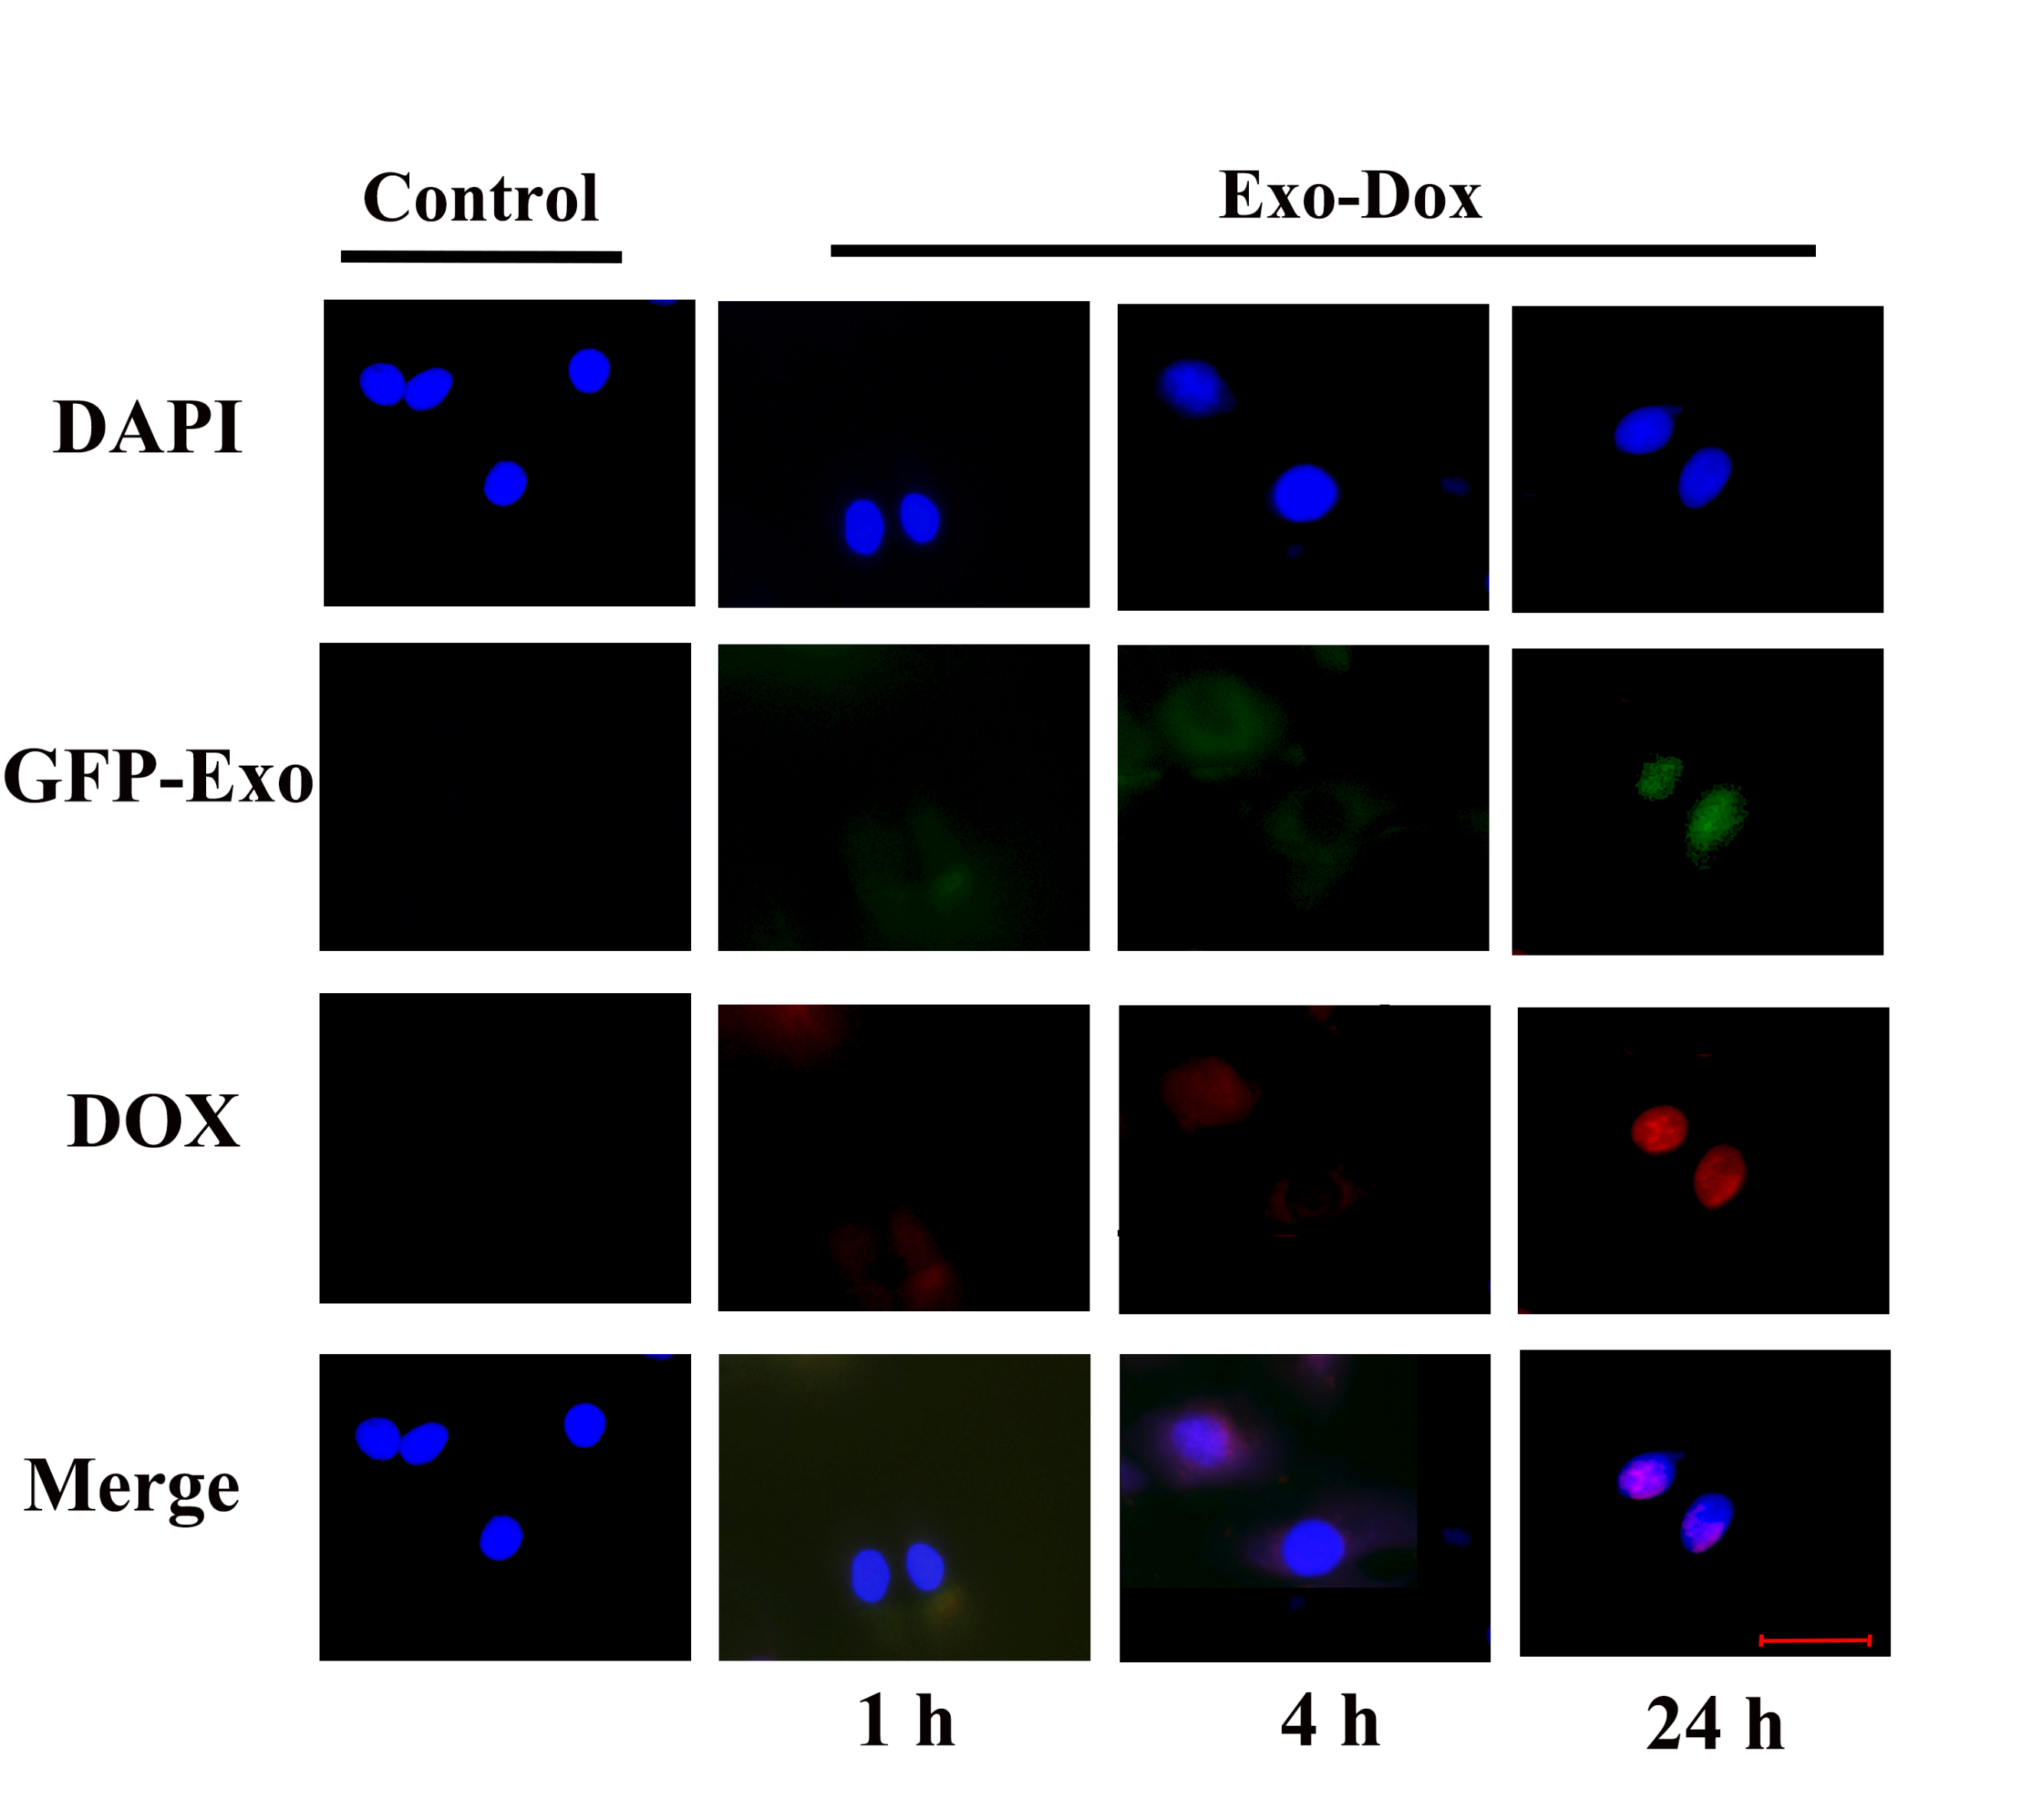
**

**(B)**

**(C)**

**
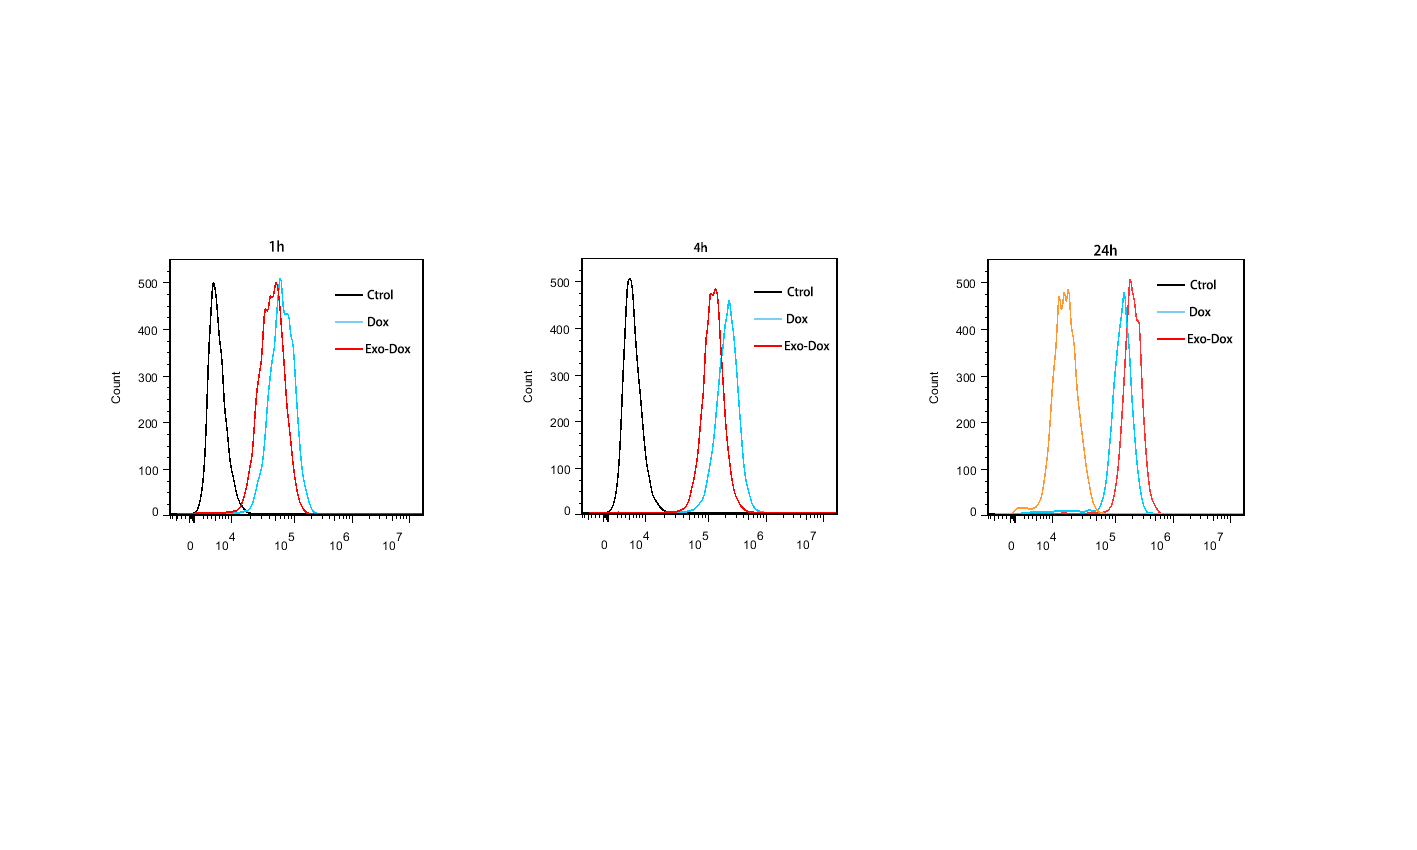
**

**(D)**

**
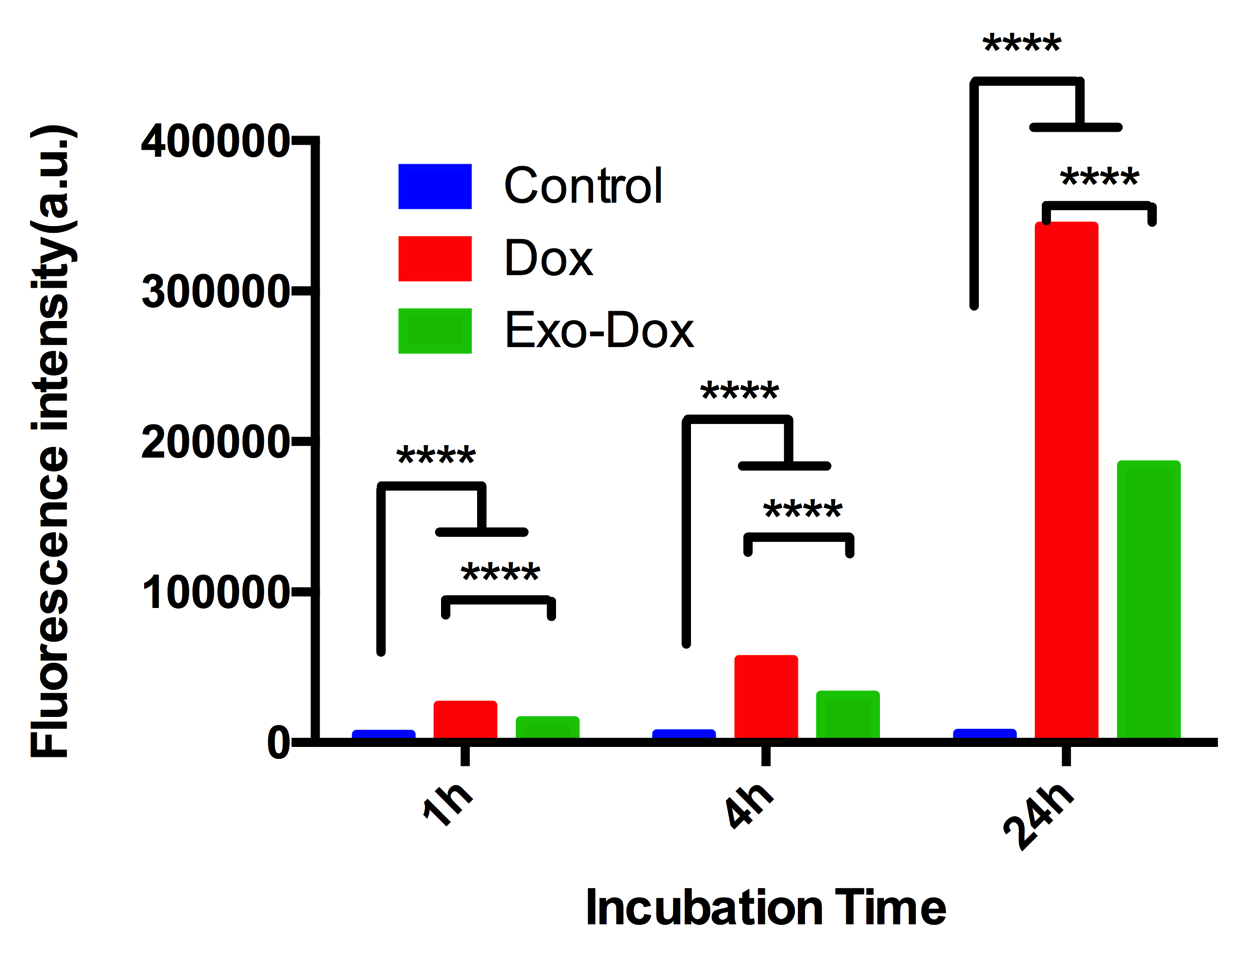
**

**Figure S2** Cell viability of H9C2 cells exposed to different concentrations of free doxorubicin, exosome-doxorubicin(A). The IC50 of free doxorubicin and exosome-doxorubicin (B), where the value was calculated according to Figure A.

**(A)**

**
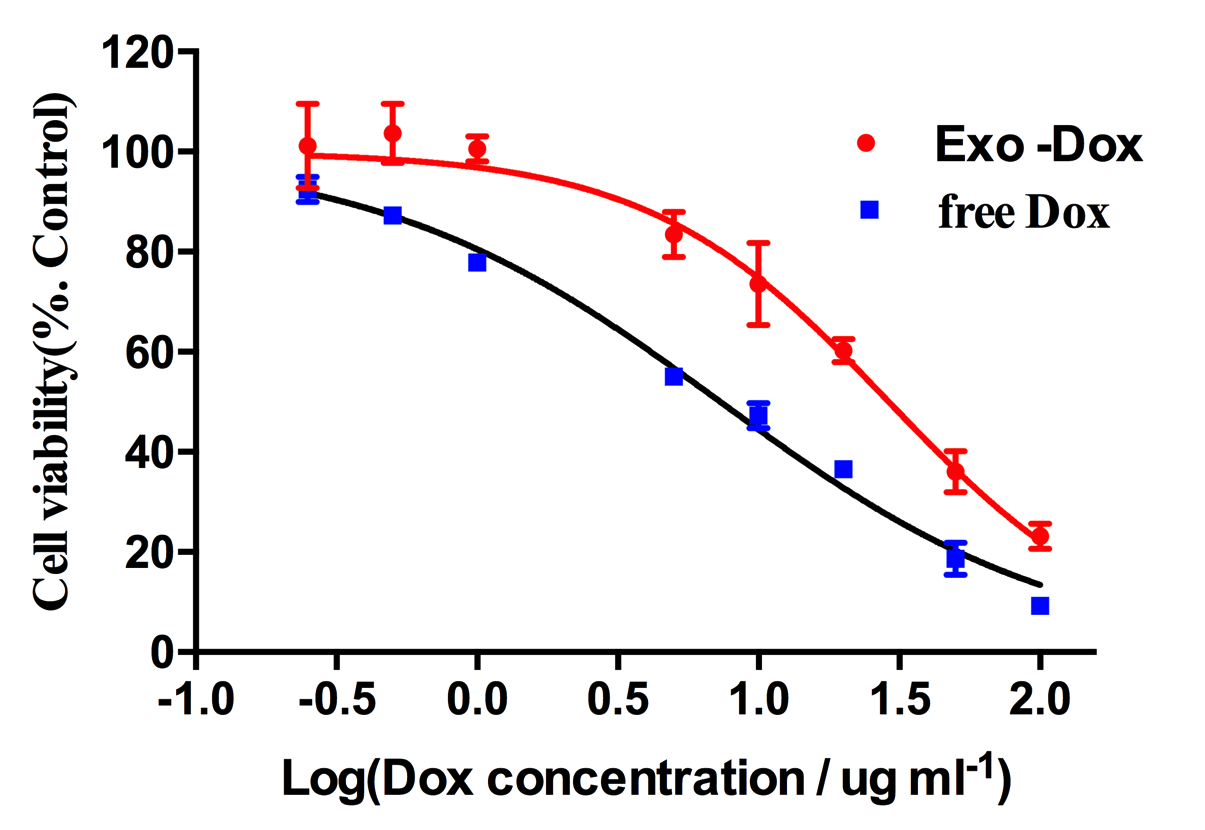
**

**(B)**
